# Supplementary material for: At-ore1 Gene Induces Distinct Novel H2O2-NACs Signaling in Regulating the Leaf Senescence in Soybeans (Glycine max L.)
Source: MDPI journal article supplement (doi:10.3390/agronomy12092110), 2022-09-05
Supplement: s1 [file s1]

Archive with 2 entries (2 files):
- Figures supplementary.pdf
- Table Supplymentary.pdf
