# Supplementary material for: At-ore1 Gene Induces Distinct Novel H2O2-NACs Signaling in Regulating the Leaf Senescence in Soybeans (Glycine max L.)
Source: MDPI journal article supplement (doi:10.3390/agronomy12092110), 2022-09-05
Supplement: s1 [file s1]

## Table Supplementary

**Table S1.** Nucleotides sequence of *Atorel* gene.

|                                                                       |                        |
|-----------------------------------------------------------------------|------------------------|
| ATGGATTACGAGGCATCAAGAATCGTCGAAATGGTAGAAGATGAAGAACATATAGATCTACCACCAG   |                        |
| GATTCAGATTTTACCCTACTGATGAAGAACTCATAACTCACTACCTCAAACCAAAGGTTTTCAACAC   |                        |
| TTTCTTCTCTGCTACTGCCATTGGTGAAGTTGATCTCAACAAGATTGAGCCTTGGGACTTACCATGT   | intron 1               |
| AAGTTTTCACACCTTATCTTTCTATTTCTCAAGTCTTTTGTGTTGTCTTTCTTACCATTAAACTCA    |                        |
| TGGTTCTGAATTCTGATACATGGCTGGTTTTGTTGGAACAGGGAAGGCTAAGATGGGAGAAAAAGAA   |                        |
| TGGTATTTCTTCTGTGTGAGAGACCGGAAATACCCGACCGGTTTAAGGACAAACCGGGCGACAGAAG   |                        |
| CCGGTTATTGGAAAGCCACAGGAAAAGACAAAGAGATATTCAAGGGAAAATCACTTGTGGGTATGAA   |                        |
| GAAAACTTTGGTTTTTCTATAAAGGAAGAGCTCCTAAAGGAGTTAAAACCAATTGGGTTATGCATGAA  |                        |
| TATCGTTTTAGAAGGCAAATATTGTATTGAAAATCTTCCCCAAACAGCTAAGGTAATAACATTAAAGAG | intron 2               |
| ATTTTGTGTGTTTCTGTCTTTTGTGTTTTTTTGGGGACTTGAAATTAATTCTTTTGTGTTGGTTGTTTG |                        |
| TGAATGTAGAACGAATGGGTTATATGTCGTGTTTCCAAAAACGTGCCGATGGTACAAAGGTTCCAA    |                        |
| TGTCAATGCTTGATCCACACATTAACCGAATGGAACCAGCCGGTTTACCTTCGTTAATGGATTGTTC   |                        |
| TCAACGAGACTCCTTCACCGGTTTCGTCGTCTCACGTGACCTGCTTCTCCGACCAAGAAACCGAAGAC  |                        |
| AAAAGACTTGTCCACGAGTCCAAAGACGGTTTTTGGTTCTCTGTTTTTACTCGGATCCTCTGTTTTTAC |                        |
| AAGACAATTGTCTTGGAACCTACAGAGGATGCGCGTAAAACAGAGAAGCTAAATCGGGTTTGGACTCG  | T-DNA<br>insert region |
| AGGACAAGTCTTTTGTCTTCAGTGTCTTGGCCGGATAAGCGGGTCTCGTGAAACGACGATCCGGTGA   |                        |
| GAGAGTCTCTTTGAGAACAGTCCATTATCGAGCGTACTCCGGCTGGTGTCTTCAGATAGTGTGTGG    |                        |
| ATCGAGCATTGTTCTTCGGAGCCTTTGTACCATAGAGCCCGGTTTTTGGATCACGCGACATATAACCC  |                        |
| ATTTTATTCGCTAATGAAGCTGTTGCTTGACGGTCAAGAACTCAATTCTCCGGCAAACCTTTTCGAC   |                        |
| GGTCGTGATTCGTCCGGTACAGAAGAATTGGATTGCGTTTGGAAATTC                      |                        |

Note: *Atorel* gene made by T-DNA insertion in the third exon of the *Atorel* genomic sequence between position 743 and 744 of the coding region, from start codon ATG, which is indicated by nucleotides sequence under grey color. In the CDS sequence of *Atorel* (855 bp) include two intron position, which is indicate by light grey color.

**Table S2.** Sequences of oligonucleotide of *Atore1* included *cis*-regulatory element motifs identified.

AAGAACTTGATACGAAAAAATTGACCAATTATTGGTCAATATATTAAAAAGAATAAATTATTTTAGTGTTCTTATTTCTCAAATGAAAA  
CTAGTATATAGAGAGGAGCTTCGTTGCTCAAACACTTTCCTCTCTCTTAAAAACCTCAACTTTCTTCTCTCTCTCAAAAACCCTTCCC  
TCTTCGTCTCCAAACAACAACAACACAACAACAAAAATCTTACAAGAAGATCATTTTTAGAAACCCTATTAGGATAAAATGGATT  
ACGAGGCATCAAGAATCGTCGAAATGGTAGAAGATGAAGAACATATAGATCTACCACCAGGATTGAGATTTACCCCTACTGATGAAGAA  
CTCATAACTCACTACCTCAAACCAAGGTTTTCAACACTTTCCTCTCTGCTACTGCCATTGGTGAAGTTGATCTCAACAAGATTGAGCC  
TTGGGACTTACCATGTAAAGTTTCACACCTTATCTTTCTATTTCTCAAGTCTTTTGTTTGTCTTCTTTCTACCATTAACTCATGGTTC  
TGAATTCTGATACATGGCTGGTTTTGTTGGAACAGGGAAGGCTAAGATGGGAGAAAAAGAATGGTATTTCTTCTGTGTGAGAGACCGGA  
AATACCCGACCGGTTTAAGGACAAACCGGGCGACAGAAGCCGGTTATTGGAAAGCCACAGGAAAAGACAAAGAGATATTCAAGGGAAAA  
TCACTTGTGGGTATGAAGAAAACCTTTGGTTTTCTATAAAGGAAGAGCTCCTAAAGGAGTTAAACCAATTGGGTTATGCATGAATATCG  
TTTAGAAGGCAAATATTGTATTGAAAATCTTCCCCAAACAGCTAAGGTAATAACATTAAAGAGATTTTGTGTGTTTCTGTCTTTTGT  
TTTTGGGGACTTGAAATTAATTCTTTTGTGTTGGTTGTTTGTGAATGTAGAACGAATGGGTTATATGTCGTGTTTTCCAAAAACGTGCCG  
ATGGTACAAAGGTTCCAATGTCAATGCTTGATCCACACATTAACCGAATGGAACCAGCCGGTTTACCTTCGTAATGGATTGTTCTCAAC  
GAGACTCCTTCACCGGTTTCGTCGTCTCACGTGCTTCTCCGACCAAGAAACCGAAGACAAAAGACTTGTCCACGAGTCCAAAGAC  
GGTTTTGGTTCTCTGTTTTACTCGGATCCTCTGTTTTTACAAGACAATTGTCTTGGAACACTACAGAGGATGCGCGTAAACAGAGAAGCT  
AAATCGGGTTTGGACTCGAGGACAAGTCTTTTGTCTTCAGTGTCTTGGCCGGATAAGCGGGTCTCGTGAACCGACGATCCGGTGAGAGA  
GTCTCTTTGAGAACAGTCCATTATCGAGCGTACTCCGGCTGGTGTCTTCAAGATGTGTGGATCGAGCATTGTTCTTCGGAGCCTTT  
GTACCATAGAGCCCGGTTTTGGATCACGCGACATATAACCCATTTTATTCGCTAATGAAGCTGTTGCTTGACGTTCAAGAACTCAATT  
CTCCGGCAAACCTTTTCGACGGTCGTGATTCGTCCGGTACAGAAGAATTGGATTGCGTTTGGAAATTTCTGAGTTGTATAAGTTATGTTGT  
AGACTTGTAGTAGTCATGTGTTTCGTGTGTGTGAATGAATATTCTTGTTACATTTTTTTGTAAAAAAGGAGAAAAAATATGCTAGAAAG  
TCAATTGCTTTTGTATGTAGCATTAGTGTTTTTTATGTACTCAATAGACTTCCTAATTAAATAAAAATCTTAATTTATTTGCC

Note: *cis*-regulatory element motifs were scanned by the PlantCARE (<http://bioinformatics.psb.ugent.be/webtools/plantcare/html/>). The motifs related in abscisic acid, auxin, chlorophyll and MeJA-responsiveness were highlighted. Sequences in the dark red are ABRE motif (5'-ACGTG-3'), blue sequence indicates TGA element (5'-AACGAC-3'), bright green sequence is GATA box (5'-GATA-3') and yellow is TGACG-motif (5'-TGACG-3').

**Table S3.** Sequences of oligonucleotide primers used for the qPCR.

| No | Name     | Gene ID         | Forward sequence of primers (5'-3') | Reverse sequence of primers (5'-3') | Tm (°C) |
|----|----------|-----------------|-------------------------------------|-------------------------------------|---------|
| 1  | GmActin  | NM_001252731.3  | F: 5'-TTCTCTCGCTCTCTGCCTTC- 3'      | R: 5'-TTGTGCCTCATCACCAACAT- 3'      | 58      |
| 2  | GmCHLG   | XM_014768972.3  | F: 5'-AGGGCTCTAGGGCTTCAGTC- 3'      | R: 5'-AGGGTCCTTGCGGAAATACT- 3'      | 60      |
| 3  | GmSGR1   | AY850141.1      | F: 5'-GGTTCCTGTTGCAAGGTTGT- 3'      | R: 5'-GAGAGATTGCCAAGGTGAGC- 3'      | 60      |
| 4  | GmNYC1   | NM_001358945.1  | F: 5'-TATAGACGGGGCAGGTTTCAG- 3'     | R: 5'-CCATTCCTGGCGAAAGATTA- 3'      | 60      |
| 5  | GmSAG39  | XM_026124662.1  | F: 5'-AGGGAAAAGCGTTTCAGGAT- 3'      | R: 5'-ATGGATGGTACTGCCCTCAC- 3'      | 60      |
| 6  | GmRBOH-E | XM_014767463.2  | F: 5'-TCCACAACAAAAGACCCACA- 3'      | R: 5'-ACCAGACCAAAGAGGTGGTG - 3'     | 58      |
| 8  | GmVPE    | NM_001249749.2  | F: 5'-GTGAAAGTGGGAGCGTGTTT- 3'      | R: 5'-CCGTTGCTTTACCGATTTGT- 3'      | 60      |
| 8  | GmABI5   | XM_014765566.1  | F: 5'-GGAGAGTGGCAAGAACTTCG- 3'      | R: 5'-CCAAACCTCGTCCACTGTTT- 3'      | 59      |
| 9  | GmNAC081 | DQ028774.1      | F: 5'-CTTTAGCAGCCCACAGGAAG- 3'      | R: 5'- TTCCCAAAGGGCATTTGTAG - 3'    | 58      |
| 10 | GmNAC065 | NM_001251701.2  | F: 5'-ATTTGCCAGGTGATTTGGAG- 3'      | R: 5'-TGGATCCATTAGGAGGCTTG- 3'      | 59      |
| 12 | GmNECD3  | Glyma.15g250100 | F: 5'- CGAATCCCAACAGGTCAACT- 3'     | R: 5'-CTTTCGTCCGAGCTTGTTTC- 3'      | 58      |
| 13 | GmICS1   | XM_003522145.4  | F: 5'-GGCATTGTAAGGTTGCAGGT- 3'      | R: 5'-GATGTGGCTGGGAAAAGAAA- 3'      | 60      |
| 14 | GmYUUCA6 | XM_003550066.5  | F: 5'-GGGCCATAAAGCACACAAGT- 3'      | R: 5'-ACCAATCCACAAACCGGATA- 3'      | 58      |
| 15 | GmNPR1   | FJ418595.1      | F: 5'-CGCATGCTGAGACAACATCT- 3'      | R: 5'-CCCATCTCCACTGTTTTTCGT- 3'     | 60      |
| 16 | GmARF2   | Glyma01g25270   | F: 5'-CACCCCTCAAAATTCAACAG- 3'      | R: 5'-AGAGTAAGTAGGTCTTCTCCCAGTG- 3' | 57      |
